# Supplementary material
Source: publisher figshare collection journal article supplement (https://tandf.figshare.com/ndownloader/files/25725453)
Supplement: Supplementary file 1 [file 25725453]

# Supplementary material

The Association between COVID-19 Cases and Deaths and Web-based Public Inquiries

Julia Schnoell1, Gerold Besser1, Bernhard J. Jank1, Tina J. Bartosik1, Thomas Parzefall1, Dominik Riss1, Christian A. Mueller1, David Tianxiang Liu1

1 Department of Otorhinolaryngology, Head and Neck Surgery, Medical University of Vienna, Vienna, Austria

## Corresponding author

Christian A. Mueller MD

Department of Otorhinolaryngology, Head and Neck Surgery

Medical University of Vienna

Waehringer Guertel 18-20

1090 Vienna, Austria

Telephone: +43 1 40 400 33340

Fax: +43 1 40400 33320

E-Mail: [christian.a.mueller@meduniwien.ac.at](mailto:christian.a.mueller@meduniwien.ac.at)

Supplementary Table 1.Country-specific search terms

## AUSTRALIA

coronavirus australia, coronavirus update, coronavirus cases, coronavirus news, coronavirus symptoms, corona, coronavirus in australia, victoria coronavirus, nsw coronavirus, coronavirus update australia, coronavirus australia cases, world coronavirus, worldometer coronavirus, coronavirus worldometer, coronavirus stats, coronavirus latest, coronavirus live, coronavirus toll, coronavirus numbers, coronavirus sydney, coronavirus melbourne, italy coronavirus, coronavirus italy, coronavirus china, coronavirus death toll

## BRAZIL

brasil coronavirus, coronavirus no brasil, coronavirus sintomas, coronavirus casos, corona, mortes coronavirus, casos de coronavirus, coronavirus mundo, coronavirus hoje, casos coronavirus brasil, italia, coronavirus italia, mortes coronavirus brasil, coronavirus no mundo, corona virus, coronavirus casos no brasil, noticias coronavirus, vacina coronavirus, sintomas do coronavirus, coronavirus china, casos de coronavirus no brasil, china, coronavirus g1, mortos coronavirus, coronavirus brasil hoje

## CANADA

coronavirus canada, coronavirus update, coronavirus cases, thank you coronavirus helpers, ontario coronavirus, coronavirus news, coronavirus symptoms, coronavirus quebec, corona, coronavirus world, coronavirus in canada, coronavirus map, coronavirus bc, coronavirus tips, usa coronavirus, toronto coronavirus, alberta coronavirus, canada coronavirus cases, coronavirus death, coronavirus worldometer, italy coronavirus, coronavirus italy, china coronavirus, coronavirus us, coronavirus live

## GERMANY

corona deutschland, corona aktuell, corona virus, corona zahlen, corona news, corona bayern, bayern corona, corona nrw, corona fälle, rki corona, karte corona, italien corona, berlin corona, corona usa, hopkins corona, corona live, niedersachsen corona, corona infizierte, corona fallzahlen, corona sachsen, symptome corona, corona symptom, hessen corona, corona in deutschland, corona tote

## ITALY

coronavirus italia, coronavirus notizie, il coronavirus, news coronavirus, ultime coronavirus, coronavirus oggi, ultime notizie coronavirus, coronavirus lombardia, corona, sintomi coronavirus, casi coronavirus, contagi coronavirus, coronavirus morti, morti coronavirus, coronavirus in italia, coronavirus roma, coronavirus bollettino, dati coronavirus, mappa coronavirus, coronavirus mondo, decreto coronavirus, coronavirus sicilia, coronavirus campania, veneto coronavirus, coronavirus milano

## SOUTH AFRICA

coronavirus Africa, coronavirus south africa, update coronavirus, coronavirus in africa, coronavirus in south africa, coronavirus news, coronavirus latest, coronavirus stats, coronavirus cases, coronavirus south africa update, coronavirus worldometer, coronavirus symptoms, sa coronavirus, coronavirus tips, thank you coronavirus helpers, coronavirus cases south africa, coronavirus world, latest coronavirus south africa, coronavirus news south africa, coronavirus live, italy coronavirus, latest coronavirus news, coronavirus cases in south africa, coronavirus china, coronavirus death

## SOUTH KOREA

coronavirus korea, coronavirus update, coronavirus cases, coronavirus south korea, south korea, corona, coronavirus map, world coronavirus, coronavirus us, thank you coronavirus helpers, coronavirus in korea, coronavirus news, coronavirus tips, coronavirus worldometer, coronavirus live, coronavirus usa, coronavirus china, corona virus, coronavirus country, coronavirus wuhan, wuhan, italy coronavirus, italy, symptoms, coronavirus symptoms, 코로나 증상, 폐렴 증상, 폐렴, 코로나 바이러스 증상, 우한 증상, 우한, 우한 폐렴, 우한 폐렴 증상, 코로나 19 증상, 임신 증상, 신종 코로나, 신종 코로나 증상, 코로나 초기 증상, 디스크 증상, 당뇨 증상, 임신 초기 증상, 인후통 증상, 신종 코로나 바이러스, 식도염 증상, 인후통, 감기 증상, 신종 코로나 바이러스 증상, 독감 증상, 대상 포진 증상, 공황 장애 증상

## SPAIN

coronavirus españa, el coronavirus, coronavirus en españa, coronavirus ultima hora, coronavirus noticias, casos coronavirus, coronavirus madrid, coronavirus hoy, coronavirus italia, coronavirus sintomas, coronavirus mundo, muertos coronavirus, coronavirus mapa, ultimas noticias coronavirus, coronavirus datos, el mundo coronavirus, coronavirus casos españa, coronavirus china, coronavirus andalucia, infectados coronavirus, coronavirus españa hoy, coronavirus galicia, coronavirus en el mundo, coronavirus valencia, sintomas del coronavirus

## UNITED KINGDOM

uk coronavirus, news coronavirus, coronavirus update, coronavirus cases, coronavirus deaths, coronavirus symptoms, coronavirus in uk, bbc coronavirus, uk deaths coronavirus, coronavirus latest, uk coronavirus update, uk coronavirus cases, coronavirus uk news, bbc news coronavirus, italy coronavirus, death toll coronavirus, coronavirus world, coronavirus live, coronavirus map, coronavirus scotland, nhs coronavirus, what is coronavirus, coronavirus china, latest coronavirus news, uk death coronavirus

## UNITES STATES OF AMERICA

coronavirus cases, coronavirus update, thank you coronavirus helpers, coronavirus symptoms, coronavirus tips, coronavirus us, usa coronavirus, coronavirus map, coronavirus news, corona, coronavirus deaths, coronavirus in us, coronavirus florida, what is coronavirus, china coronavirus, new york coronavirus, coronavirus california, symptoms of coronavirus, cdc coronavirus, italy coronavirus, coronavirus nyc, coronavirus in usa, ohio coronavirus, coronavirus michigan, trump coronavirus
